# Supplementary material for: PGC1α Loss Promotes Lung Cancer Metastasis through Epithelial-Mesenchymal Transition
Source: MDPI journal article supplement (doi:10.3390/cancers13081772), 2021-04-08
Supplement: s1 [file s1]

## Article

# PGC1 $\alpha$ Loss Promotes Lung Cancer Metastasis through Epithelial-Mesenchymal Transition

Taek-In Oh <sup>1,2,†</sup>, Mingyu Lee <sup>3,4,5,†</sup>, Yoon-Mi Lee <sup>1,†</sup>, Geon-Hee Kim <sup>1,2</sup>, Daekee Lee <sup>6</sup>, Jueng Soo You <sup>7</sup>, Sun Ha Kim <sup>8</sup>, Minyoung Choi <sup>8</sup>, Hyonchol Jang <sup>8</sup>, Yeong-Min Park <sup>9</sup>, Hyun-Woo Shin <sup>3,4,5,\*</sup>, Dong Hoon Shin <sup>8,\*</sup> and Ji-Hong Lim <sup>1,2,10,\*</sup>

- <sup>1</sup> Department of Biomedical Chemistry, College of Biomedical & Health Science, Konkuk University, Chungju 27478, Korea; dk1050@kku.ac.kr (T.-I.O.); yoonmilee@kku.ac.kr (Y.-M.L.); rlarjsgml4@kku.ac.kr (G.-H.K.)
- <sup>2</sup> Department of Applied Life Science, Graduate School, BK21 Program, Konkuk University, Chungju 27478, Korea
- <sup>3</sup> Obstructive Upper airway Research (OUaR) Laboratory, Department of Pharmacology, Seoul National University College of Medicine, Seoul 03080, Korea; alligator08@snu.ac.kr
- <sup>4</sup> Department of Biomedical Sciences, Seoul National University Graduate School, Seoul 03080, Korea
- <sup>5</sup> Cancer Research Institute, Seoul National University College of Medicine, Seoul 03080, Korea
- <sup>6</sup> Department of Life Science, Ewha Womans University, Seoul 03760, Korea; daekee@ewha.ac.kr
- <sup>7</sup> Department of Biochemistry, School of Medicine, Konkuk University, Seoul 05029, Korea; jsyou@kku.ac.kr
- <sup>8</sup> Research Institute, National Cancer Center & Department of Cancer Biomedical Science, National Cancer Center Graduate School of Cancer Science and Policy, Goyang 10408, Korea; 1905205@ncc.re.kr (S.H.K.); cmy413@ncc.re.kr (M.C.); hjang@ncc.re.kr (H.J.)
- <sup>9</sup> Department of Immunology, School of Medicine, Konkuk University, Seoul 05029, Korea; immun3023@kku.ac.kr
- <sup>10</sup> Diabetes and Bio-Research Center, Konkuk University, Chungju 27478, Korea
- \* Correspondence: charlie@snu.ac.kr (H.-W.S.); dhshin@ncc.re.kr (D.H.S.); jhlim@kku.ac.kr (J.-H.L.); Tel.: +82-2-740-8285 (H.-W.S.); +82-31-920-2499 (D.H.S.); +82-43-840-3567 (J.-H.L.)
- † These authors contributed equally.

**Citation:** Oh, T.-I.; Lee, M.; Lee, Y.-M.; Kim, G.-H.; Lee, D.; You, J.S.; Kim, S.H.; Choi, M.; Jang, H.; Park, Y.-M.; et al. PGC1 $\alpha$  Loss Promotes Lung Cancer Metastasis through Epithelial-Mesenchymal Transition. *Cancers* **2021**, *13*, x. <https://doi.org/10.3390/xxxxx>

## Supplementary

Academic Editor: Daniel Neureiter

Received: 7 March 2021

Accepted: 30 March 2021

Published: date

**Publisher's Note:** MDPI stays neutral with regard to jurisdictional claims in published maps and institutional affiliations.

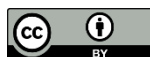

**Copyright:** © 2021 by the authors. Submitted for possible open access publication under the terms and conditions of the Creative Commons Attribution (CC BY) license (<http://creativecommons.org/licenses/by/4.0/>).

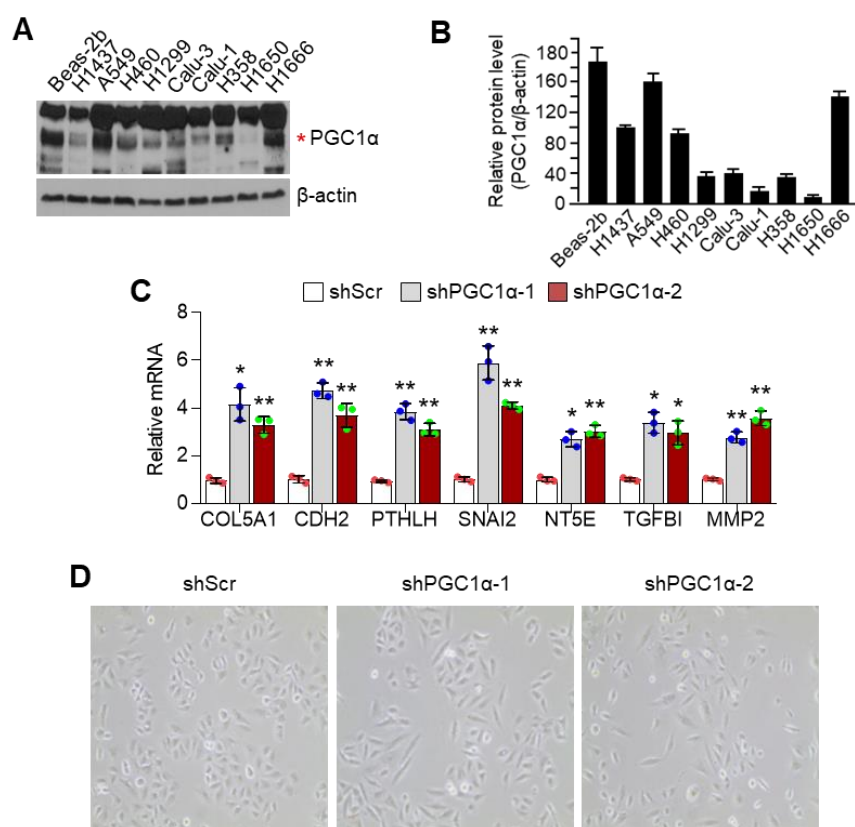

**Figure S1.** Suppression of PGC1α upregulates EMT-related genes expression in lung cancer cells. (A) Lung cancer cell lines were collected for western blot analysis. The red asterisk denotes PGC1α. (B) The PGC1α protein level was normalized to β-actin level. (C) The mRNA expression associated with epithelial and mesenchymal markers in the control or PGC1α silenced A549 cells. (D) Morphological change in control or PGC1α knock-down A549 cells. Values are represented as mean ± SD (n=3). \*p < 0.05 and \*\*p < 0.01 by Student's t-test.

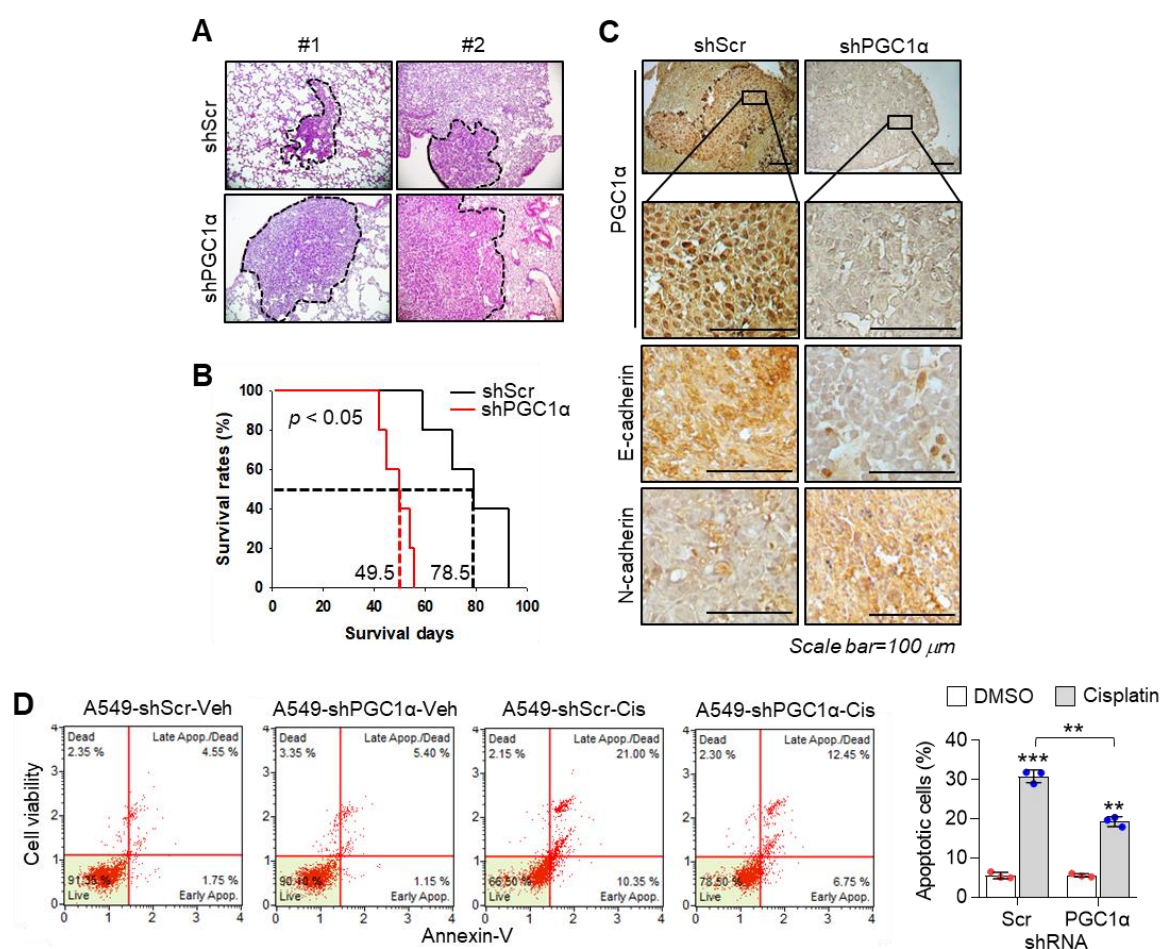

**Figure S2.** Suppression of PGC1 $\alpha$  causes chemoresistance and distant metastasis. (A) Histopathological analysis of xenografted tumors in lung tissue for hematoxylin and eosin (H&E) staining. (B) The Kaplan-Meier survival curves in mice with lung cancer xenografts by intratracheal (I.T.) injection. Survival rates in the A549 xenograft groups are represented and statistically analyzed using log-rank test ( $n=5$ ). (C) Representative images of immunohistochemistry (IHC) for PGC1 $\alpha$ , E-cadherin, and N-cadherin in xenografted primary tumor tissues. Rectangle boxes indicate magnified areas. (D) Annexin-V staining analysis and quantified apoptotic cell numbers in the control or in PGC1 $\alpha$  knocked-down A549 cells treated with cisplatin (5  $\mu$ M) for 3 days. Values are represented as mean  $\pm$  SD ( $n=3$ ). \*\* $p < 0.01$  and \*\*\* $p < 0.001$  by Student's  $t$ -test.

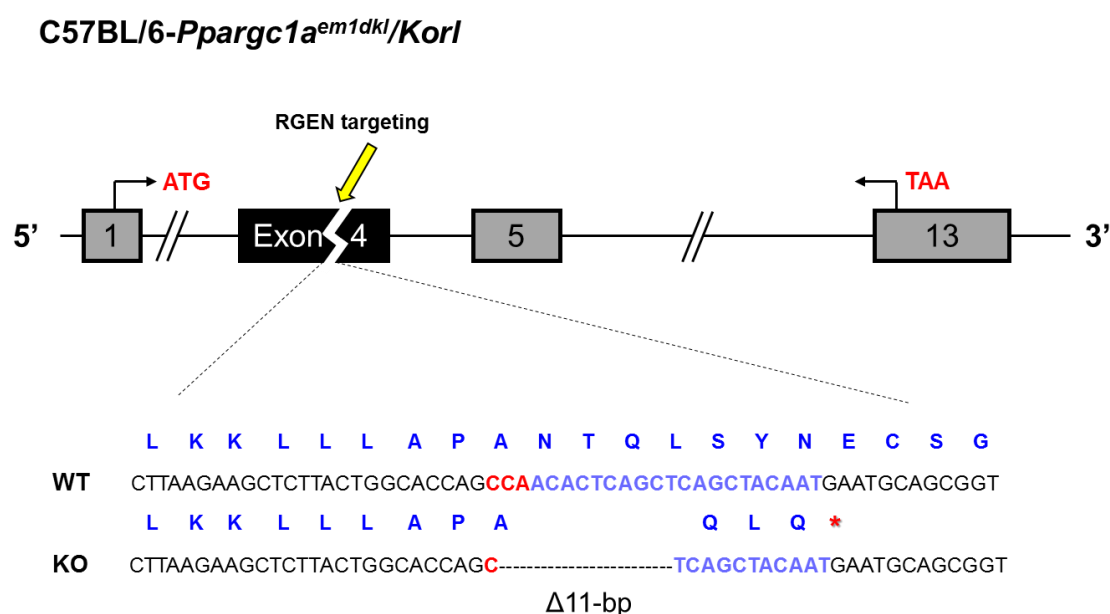

**Figure S3.** Targeting *Ppargc1a* (*Pgc1α*) allele and generation of knockout mice. Schematic representation of *Ppargc1α* (*Pgc1α*) knockout mice generation by targeting the *Pgc1α* exon 2.

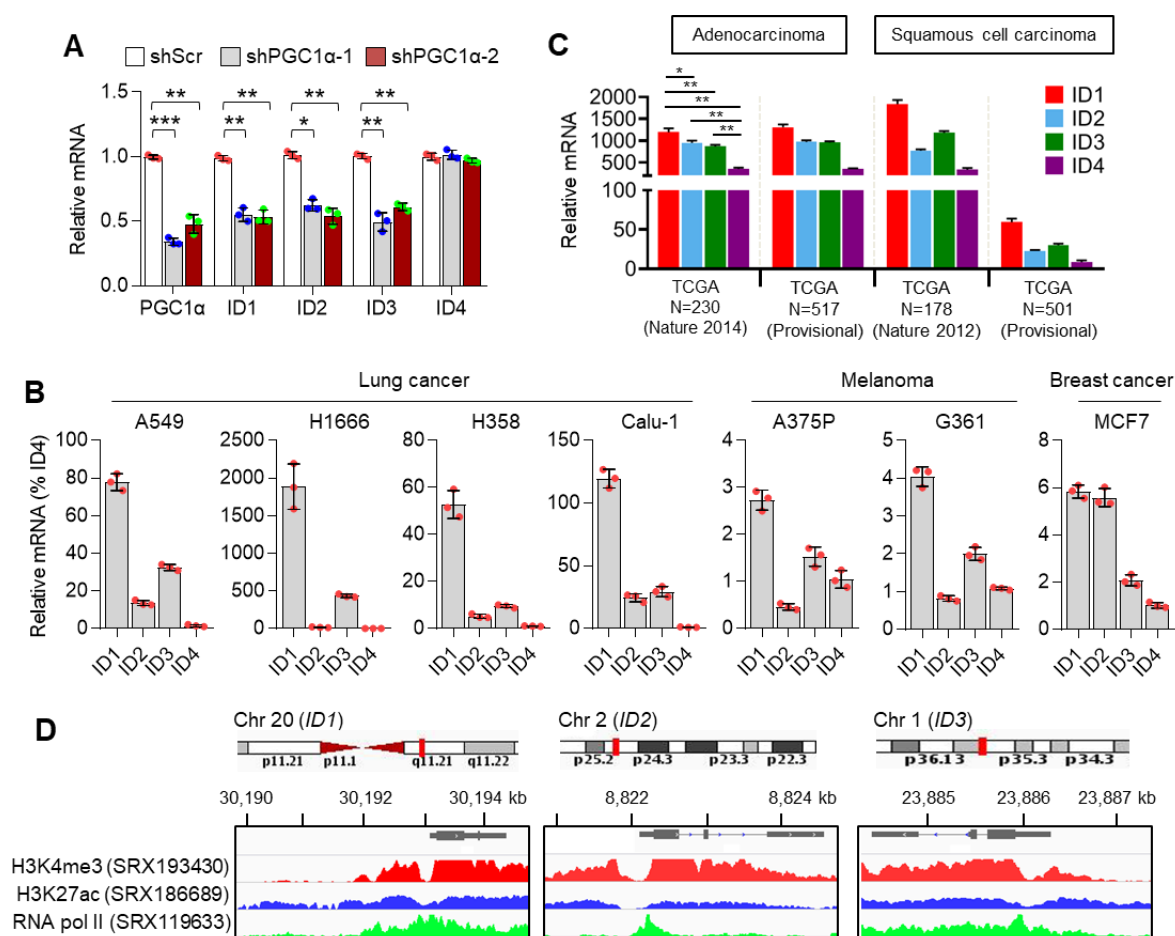

**Figure S4.** ID1 is a target of *PGC1α* and predominantly expressed in lung cancer. (A) Relative mRNA expression of IDs in the control or in *PGC1α* knocked-down A549 cells. Values are represented as mean  $\pm$  SD (n=3). \*p < 0.05, \*\*p < 0.01, and \*\*\*p < 0.001 by Student's t-test. (B) Relative mRNA expression of IDs in lung (A549, H1666, H358, and Calu-1), melanoma (A375P and G361), and breast (MCF7) cancer cell lines, as indicated. Values are represented as mean  $\pm$  SD (n=3). (C) IDs mRNA expression levels in lung cancer data sets from the cancer genome atlas (TCGA), as indicated. \*p < 0.05 and \*\*p <

0.01 by Mann-Whitney U-test. (D) ChIP-seq profiles of histone markers and RNA polymerase II enrichment indicating the transcriptionally active region of ID1, ID2, and ID3. Representative images obtained by ChIP-Atlas (<https://chip-atlas.org/>) and integrative genomic viewer (IGV).

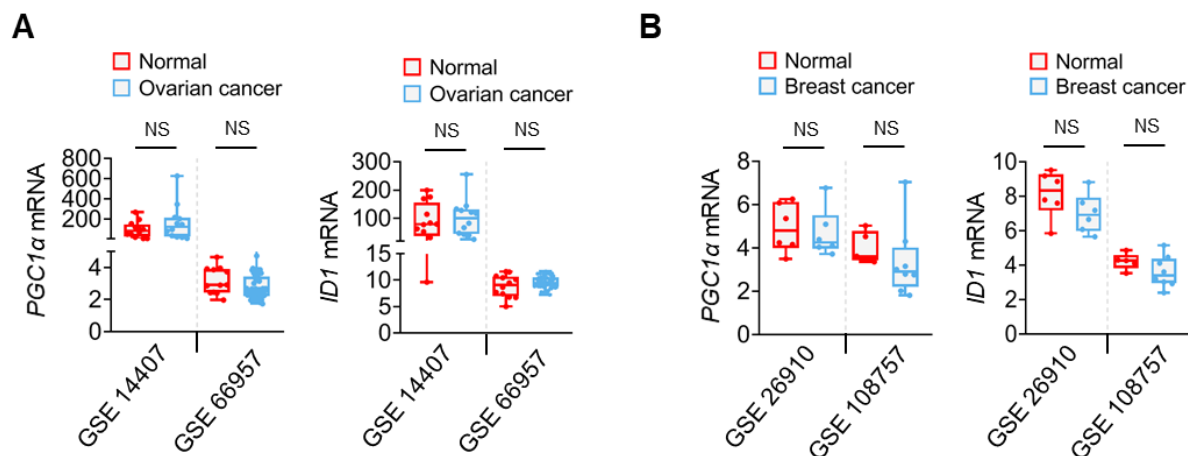

**Figure S5.** PGC1 $\alpha$  and ID1 mRNA expression is not altered in ovarian and breast cancer biopsies. (A) The mRNA levels of PGC1 $\alpha$  and ID1 in ovarian cancer and (B) breast cancer data sets, respectively. Sample sizes: GSE14407 (N, 12; ovarian cancer, 12); GSE66957 (N, 12; ovarian cancer, 57); GSE26910 (N, 6; breast cancer, 6); GSE108757 (N, 5; breast cancer, 8). Each bar represents the mean  $\pm$  SE. The statistical significance was calculated by Mann-Whitney U-test. NS, not significant.

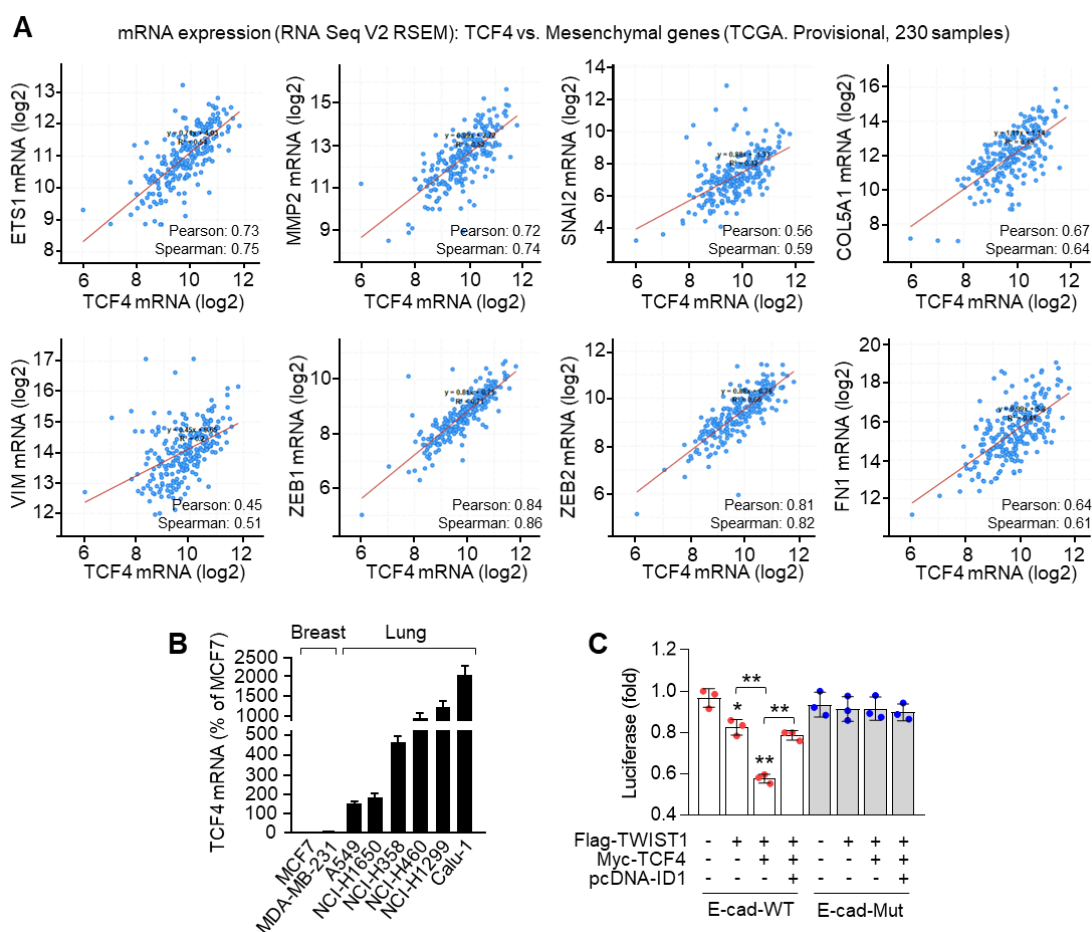

**Figure S6.** TCF4 mRNA is correlated with EMT-related genes expression. (A) Gene expression data from human cancers was analyzed using the cBioportal for cancer genomics and correlation plots between TCF4 and mesenchymal markers with Spearman's correlations are represented. (B) TCF4 mRNA levels in lung and breast cancer cell lines, as indicated.



Values are represented as mean  $\pm$  SD (n=3). (C) E-cadherin-WT and E-cadherin-Mut luciferase vectors were transfected into HEK293T cells with or without Flag-TWIST1, Myc-TCF4, and pcDNA-ID1, as indicated. Values are represented as mean  $\pm$  SD (n=3). \* $p < 0.05$  and \*\* $p < 0.01$  by Student's  $t$ -test.

**Figure 1D**

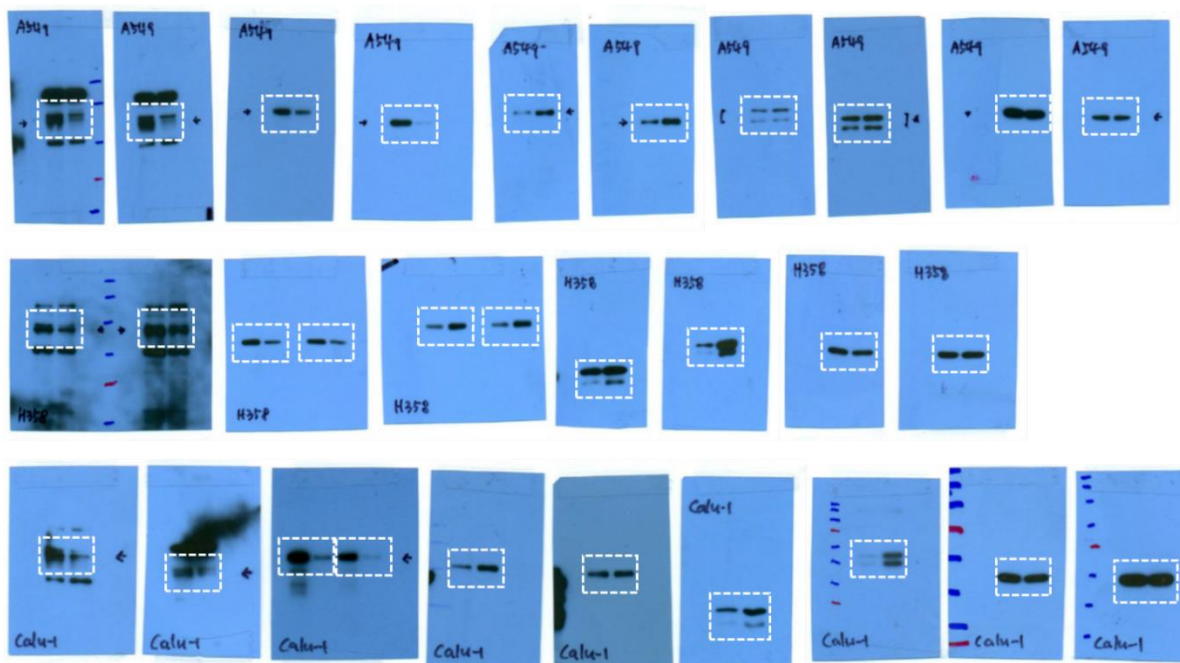

**Figure 1E**

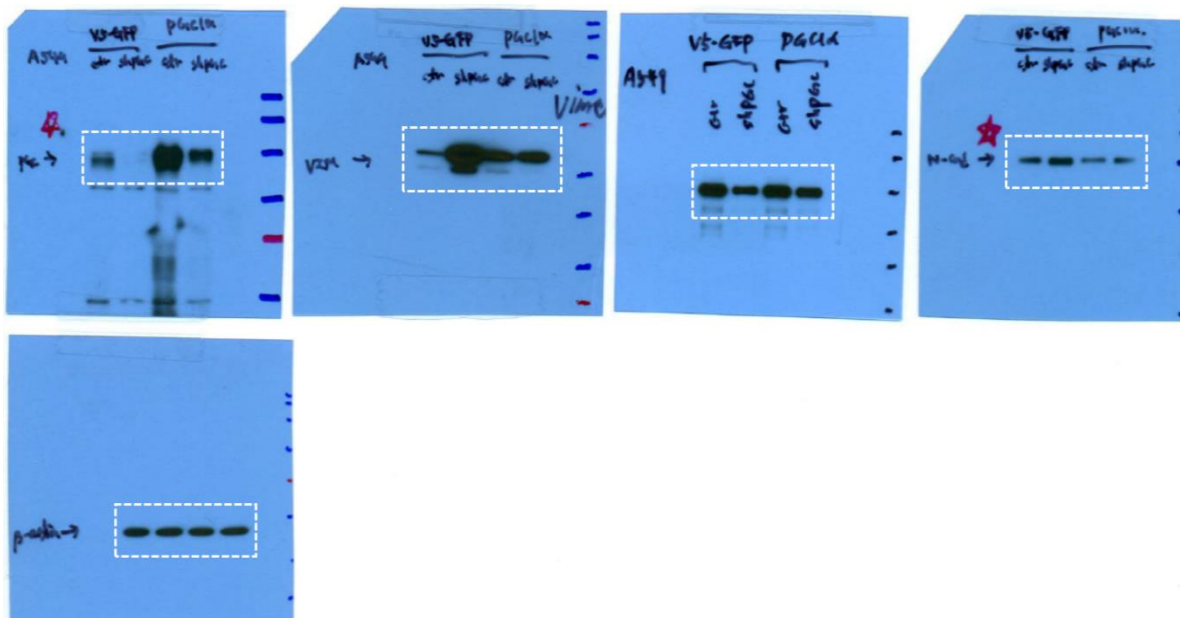

Figure 4B

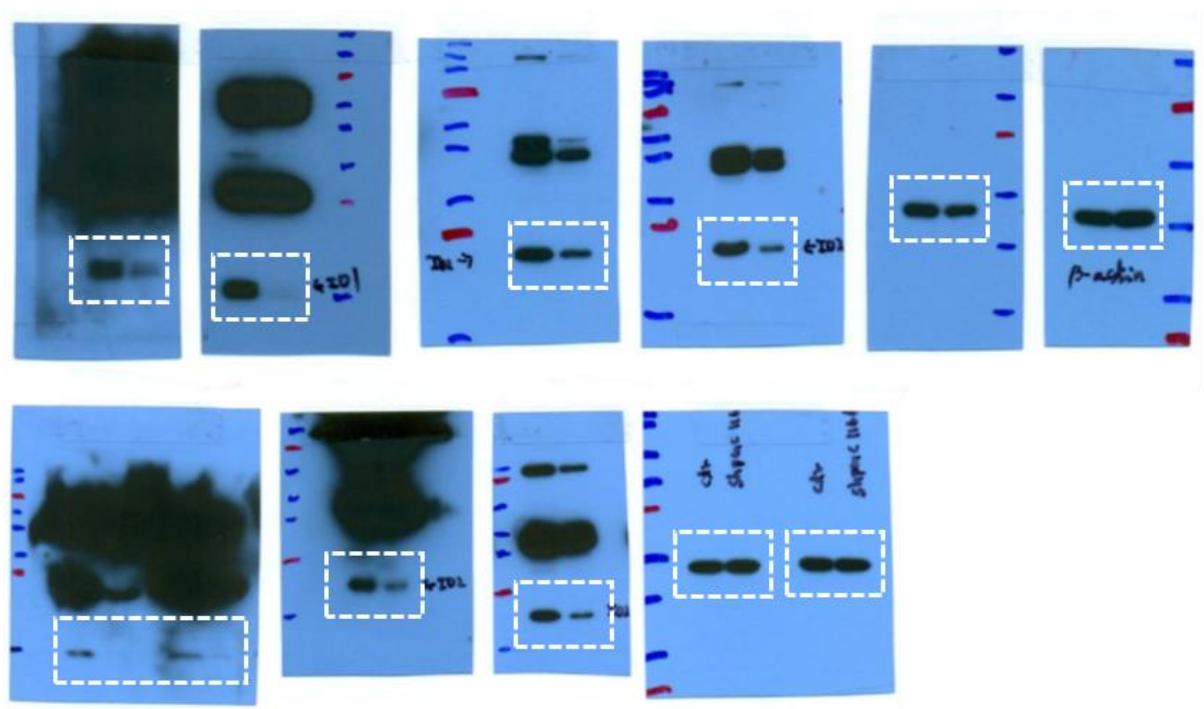

Figure 4F

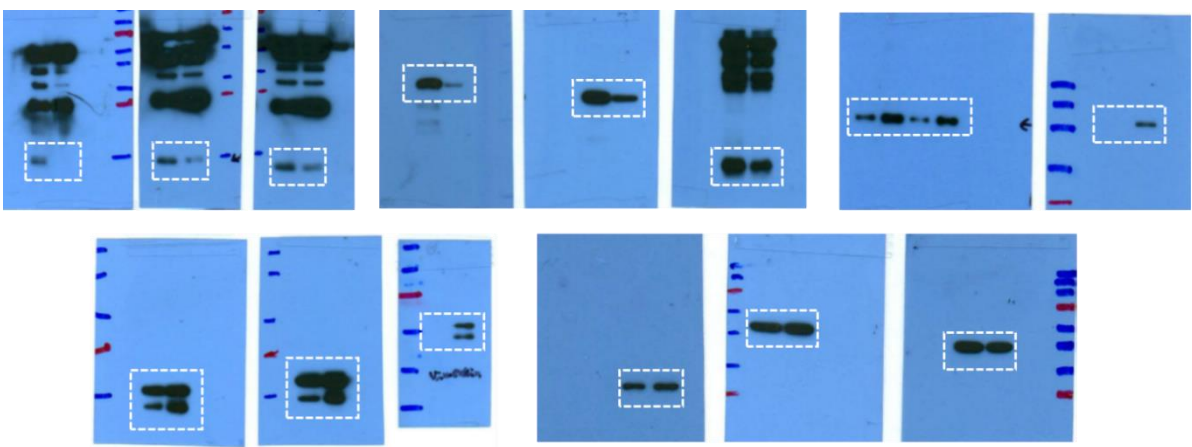

Figure 4H

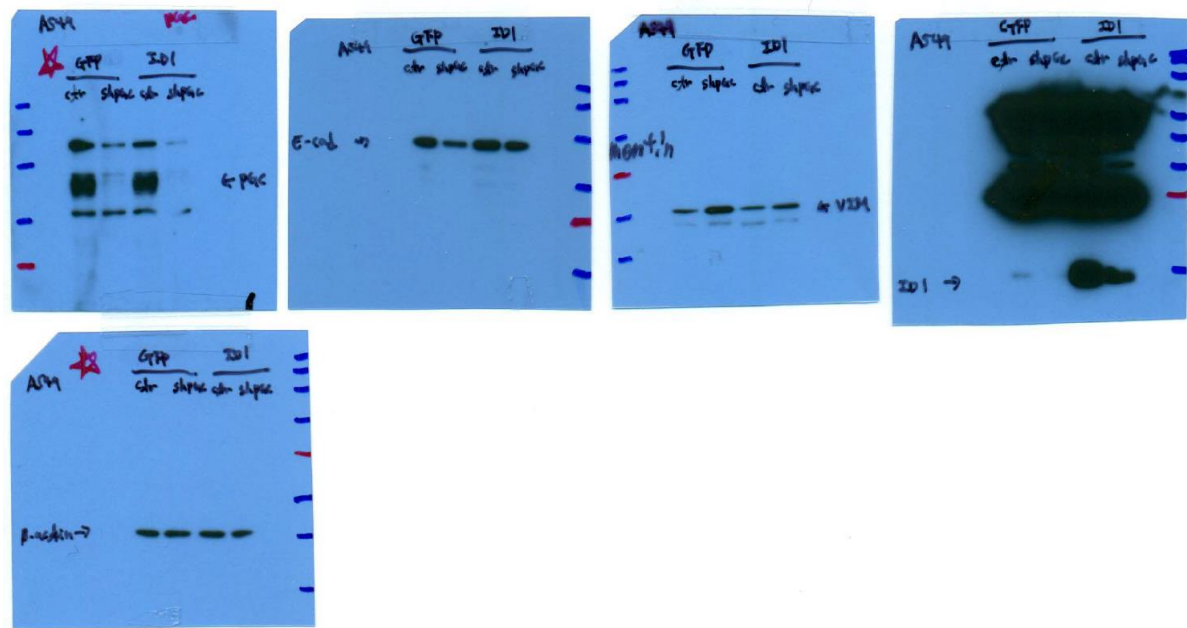

Figure 6A

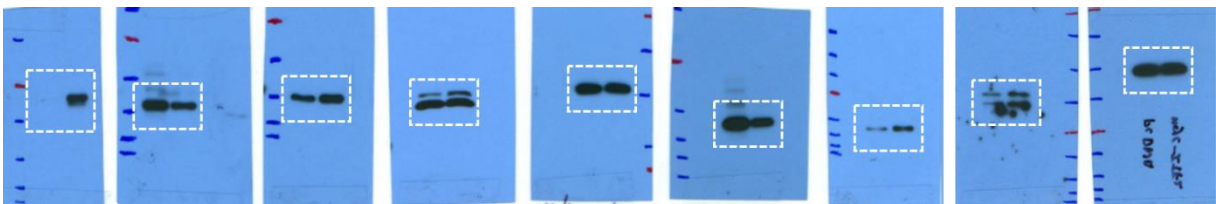

Figure 6C

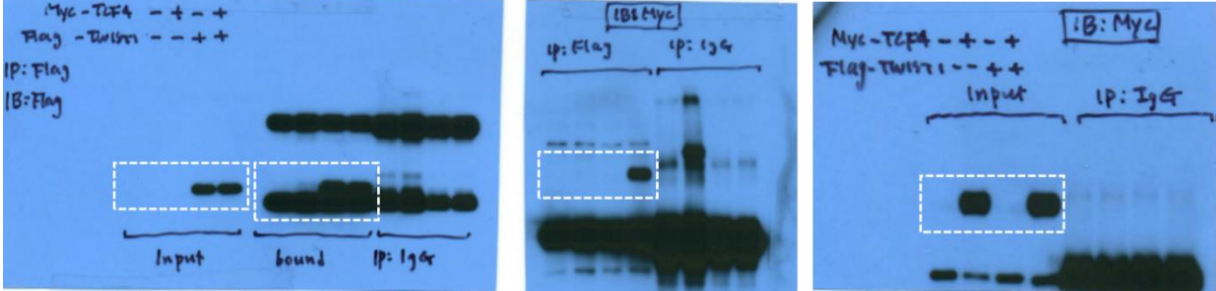

Figure 6D

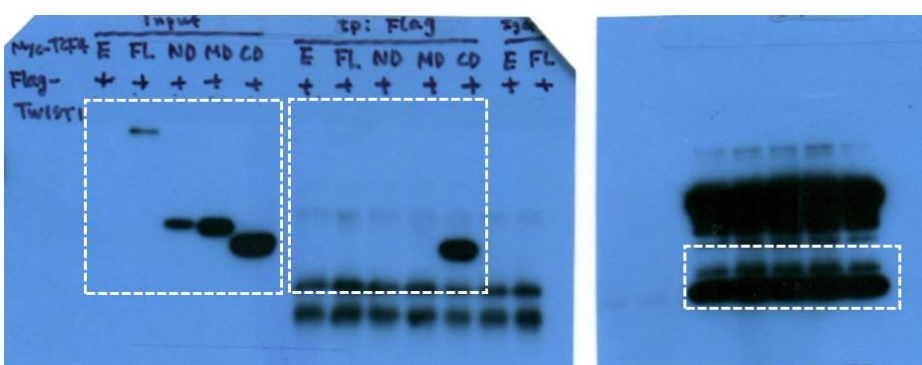



Figure 6G

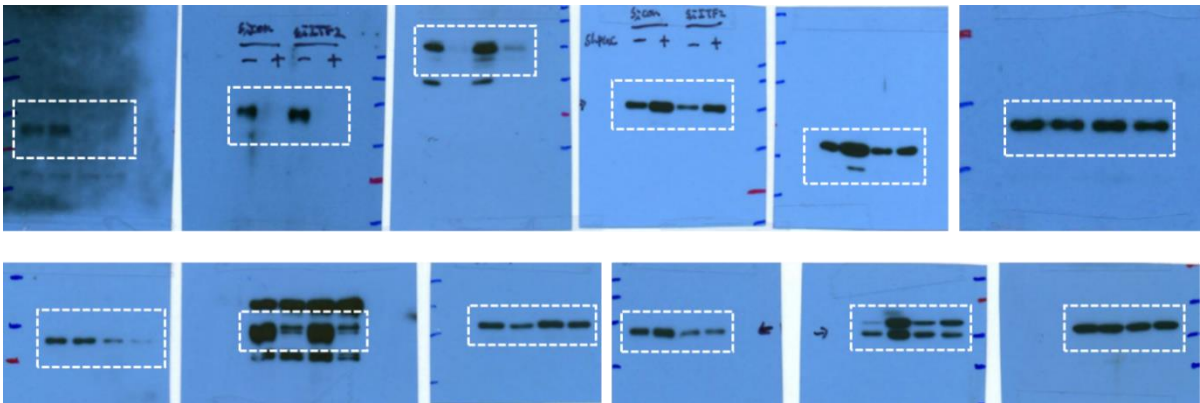

Figure 7A

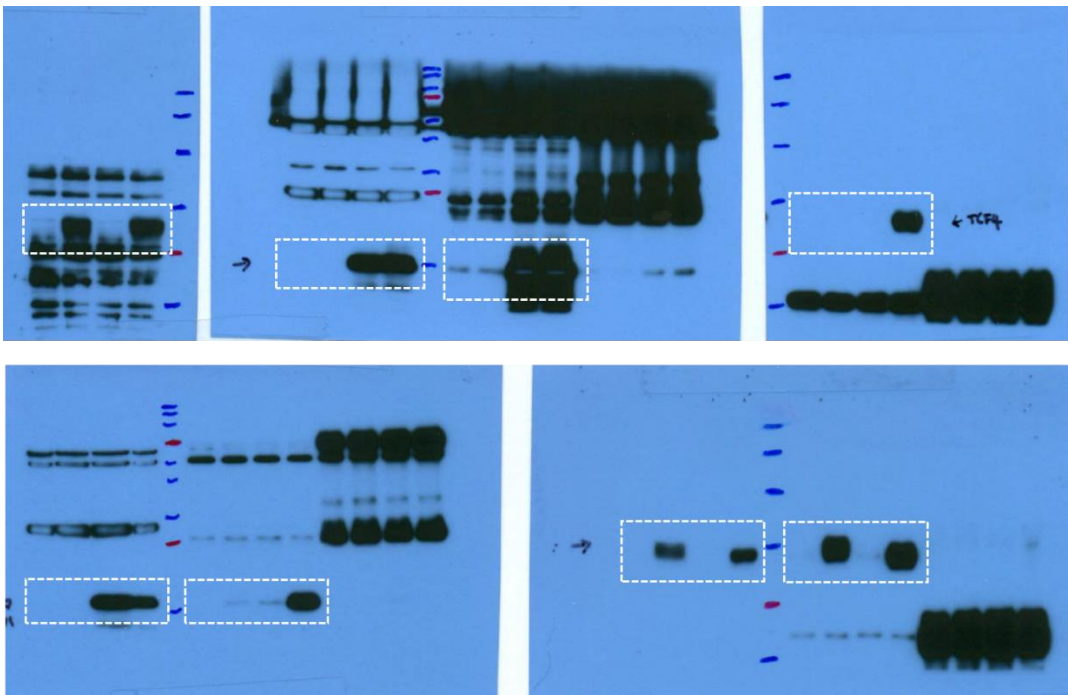

Figure 7B

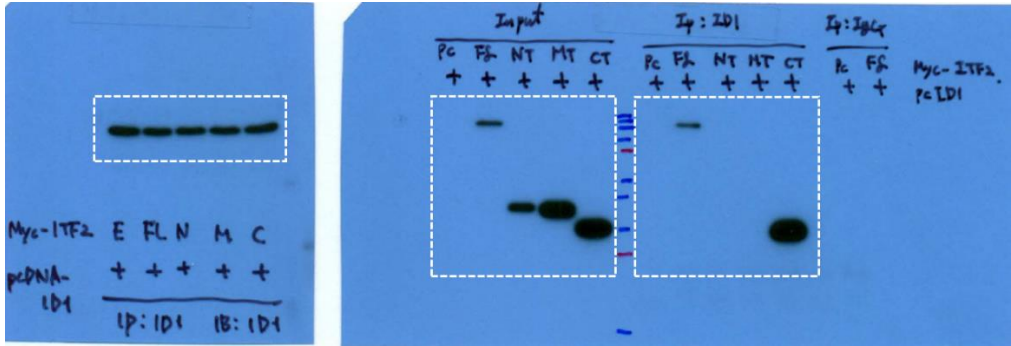

Figure 7C

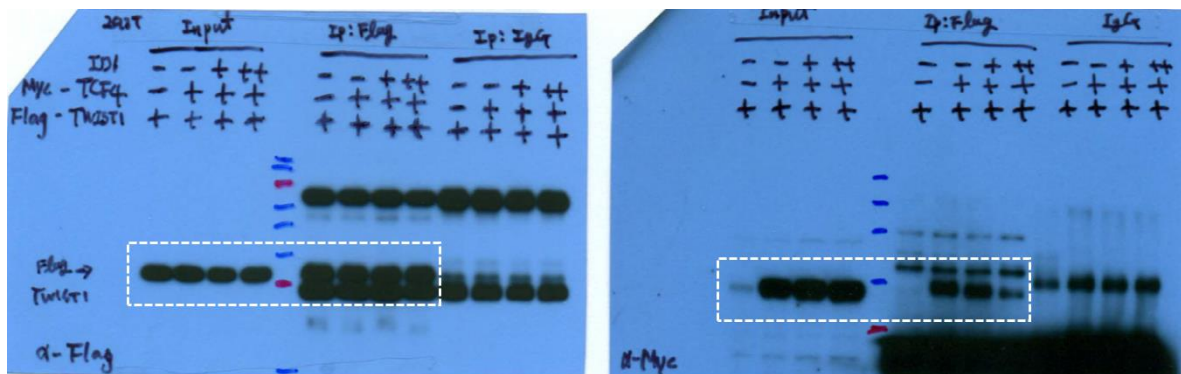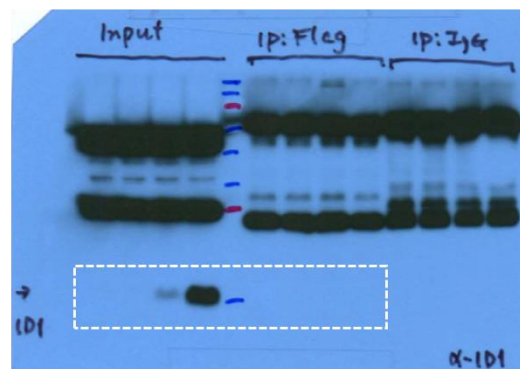

Figure 7D

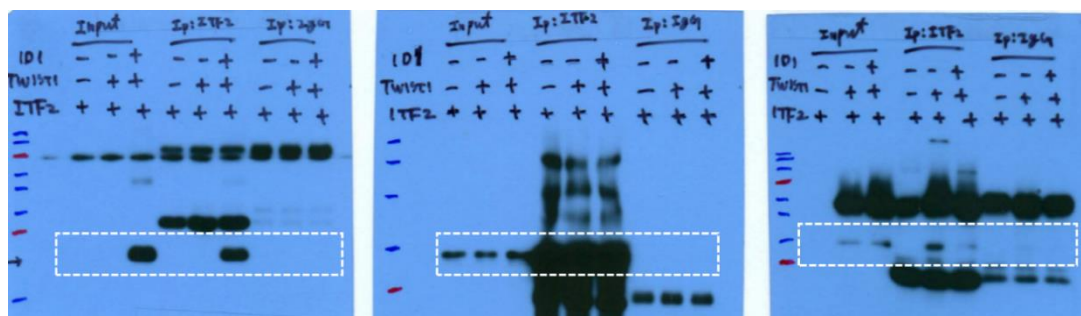

Figure 7E

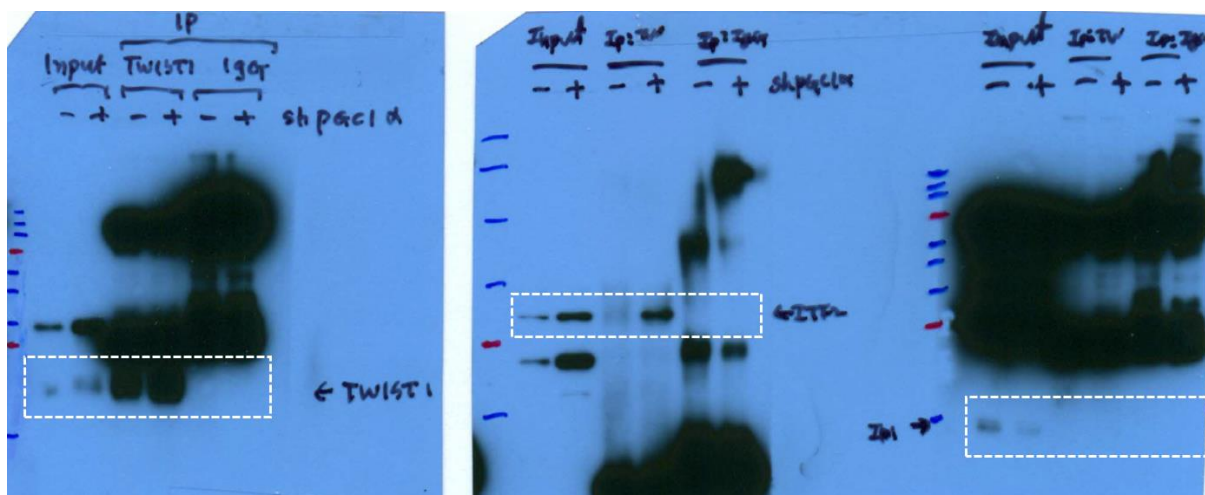

Figure 7G

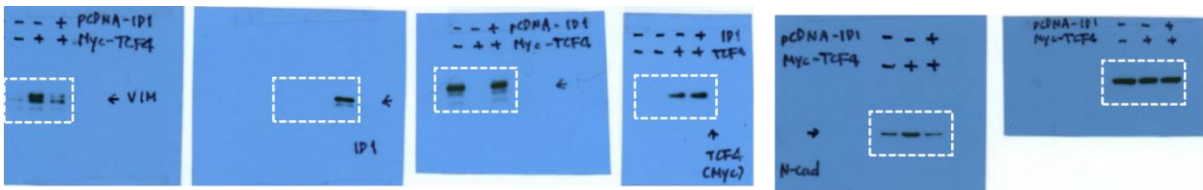

Figure S1

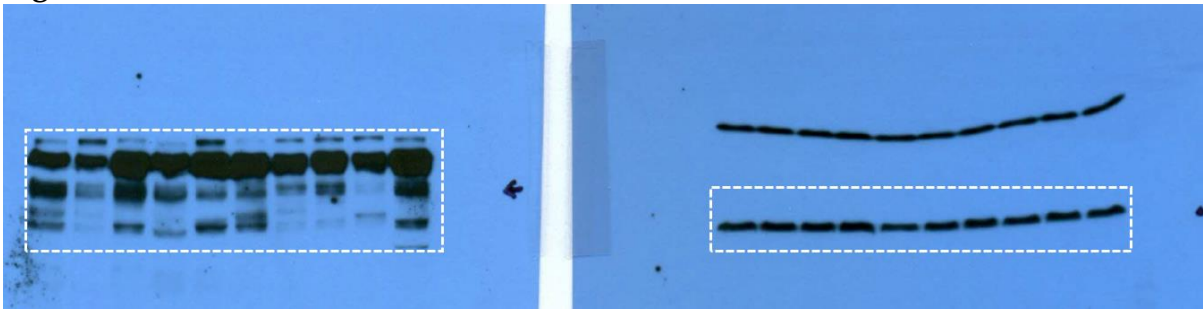

Figure S7. Whole western blot images.



## High Resolution Images for Figure 2A

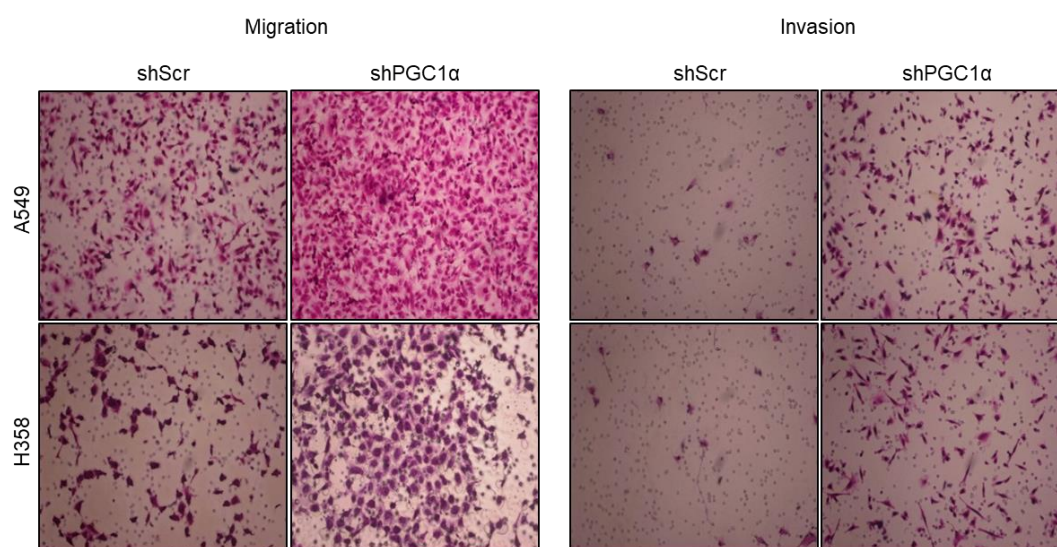

## High Resolution Images for Figure 3C

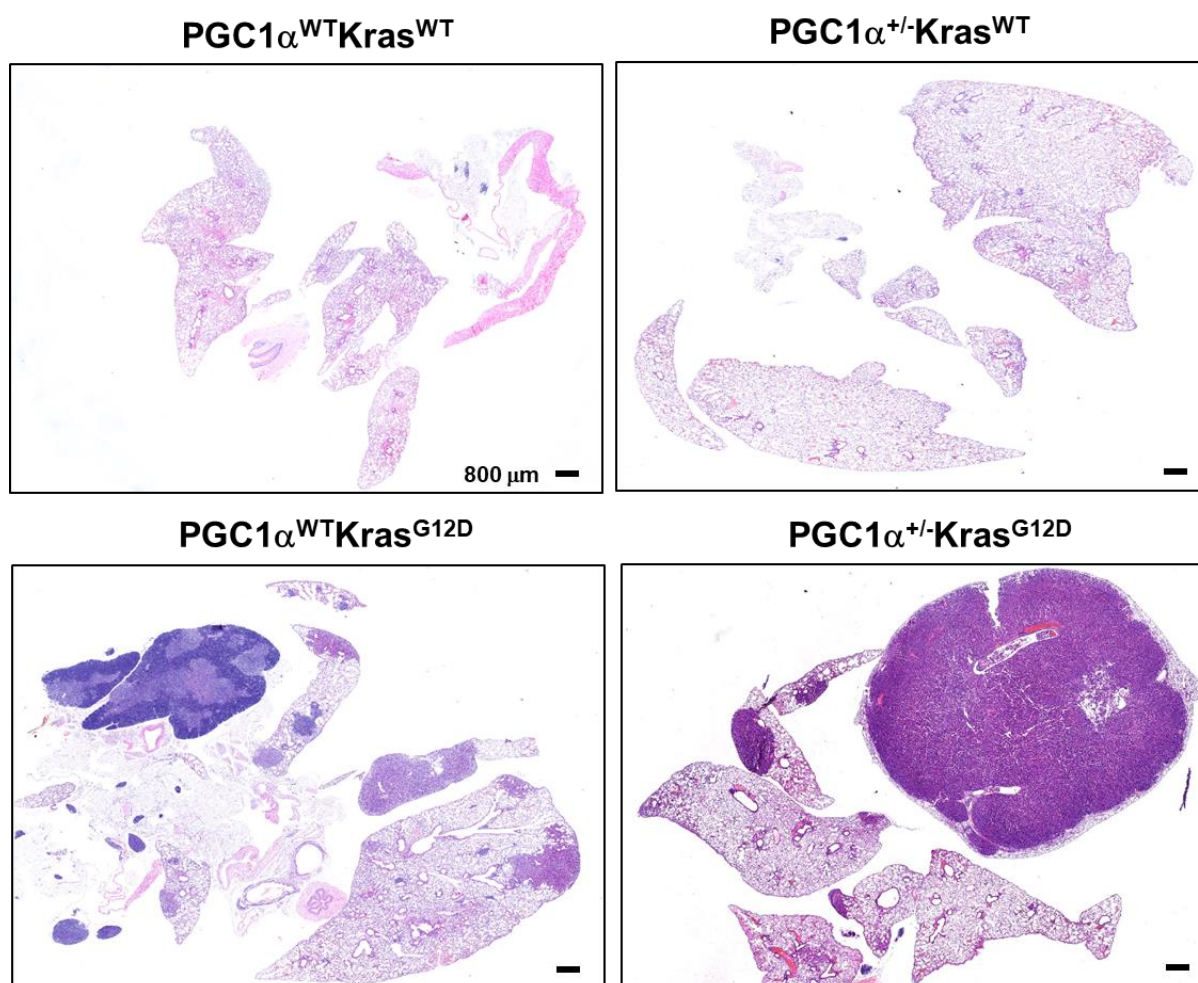

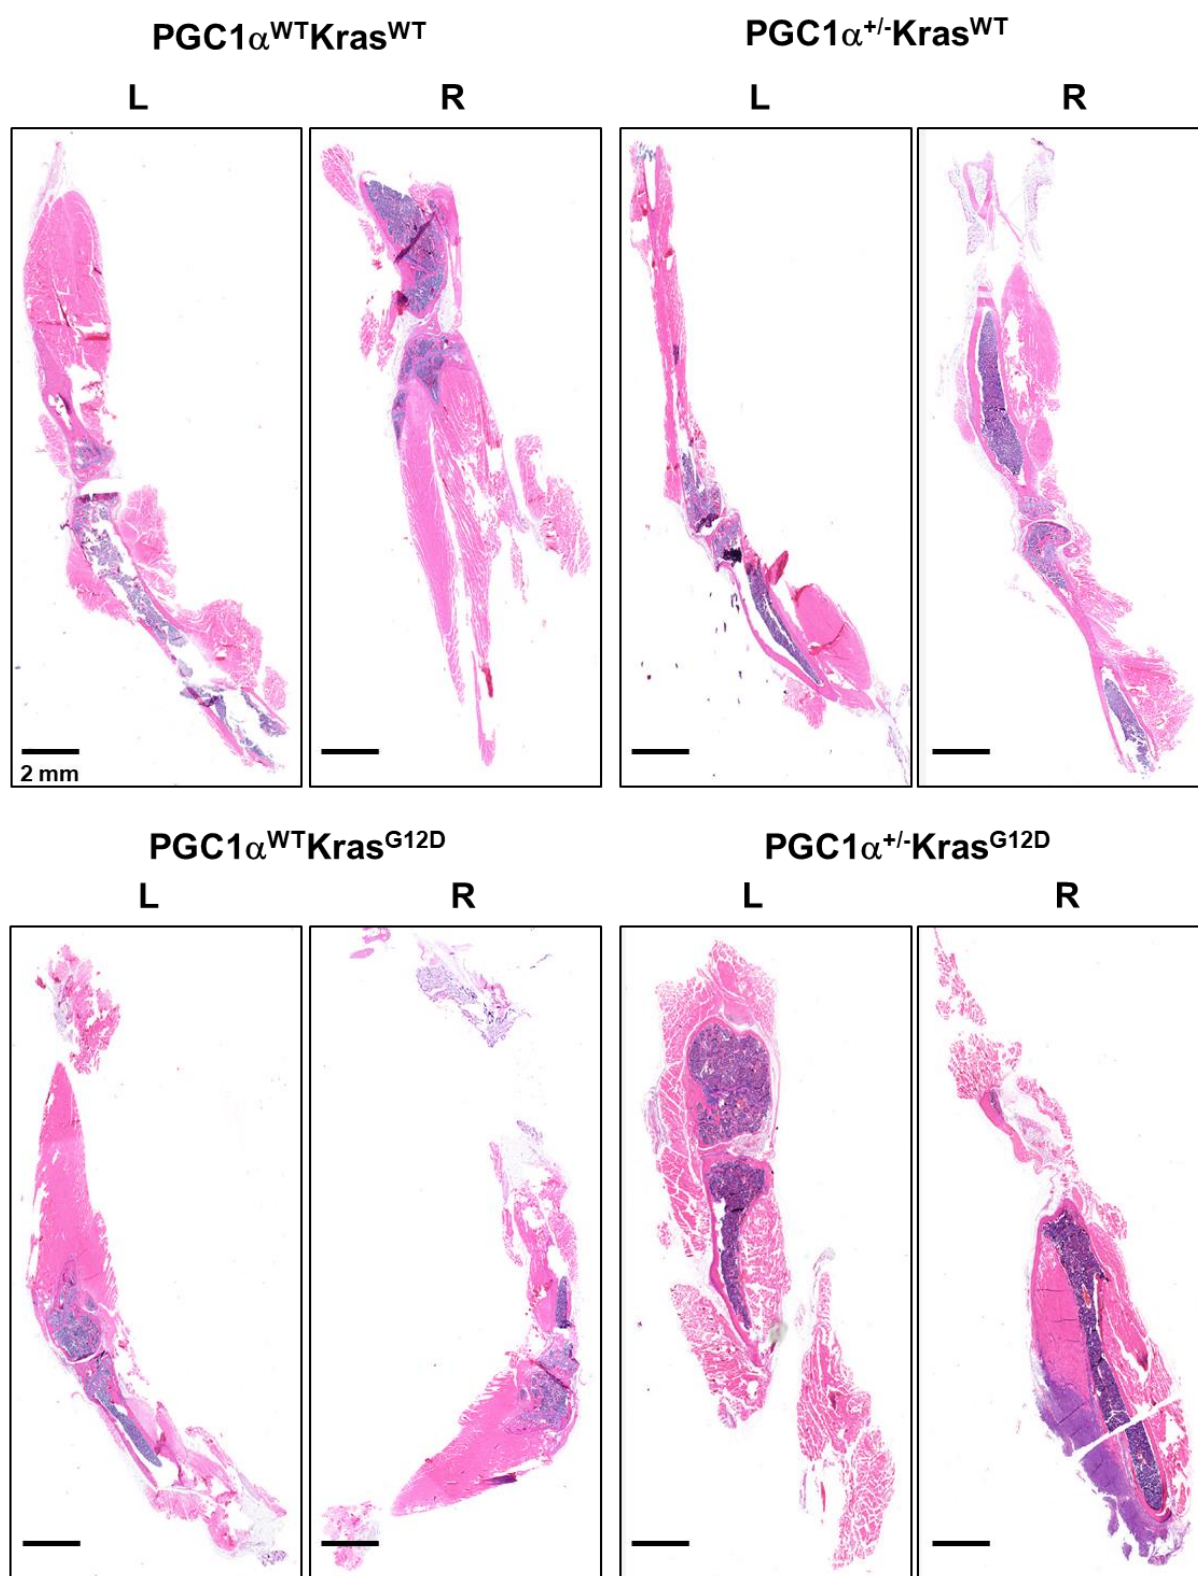



## High Resolution Images for Figure 5C

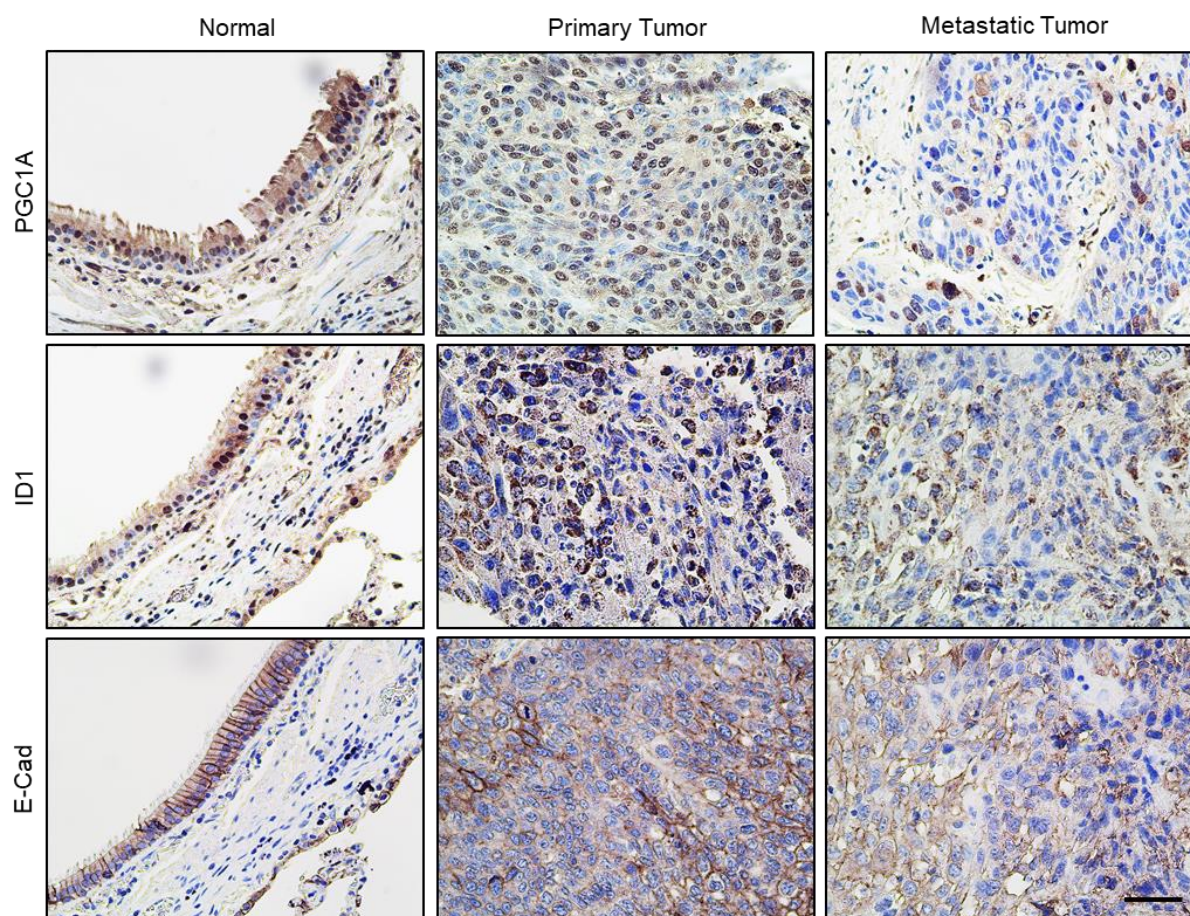

Figure S8. High Resolution Images of Figure 2A, Figure 3C and Figure 5C.

Table S1. Confirmation of lung cancer cell lines by using STR analysis.

| Sample             | D8S1179 | D21S11  | D7S820 | CSF1PO | D3S1358 | TH01       | D13S317 | D16S539 |
|--------------------|---------|---------|--------|--------|---------|------------|---------|---------|
| A549 (control)     | 13,14   | 29      | 8,11   | 10,12  | 16      | 8,9,3      | 11      | 11,12   |
| A549               | 13,14   | 29      | 8,11   | 10,12  | 16      | 8,9,3      | 11,12   | 11,12   |
| NCI-H358 (control) | 13,14   | 28,30   | 10,11  | 11,12  | 14,18   | 6          | 8,12    | 12,13   |
| H358               | 13,14   | 28,30   | 10,11  | 11,12  | 14,18   | 6          | 8,12    | 12,13   |
| Calu-1 (control)   | 10      | 28      | 9,10   | 10     | 17      | 9,9,3      | 11,12   | 11      |
| Calu-1             | 10      | 28      | 9,10   | 10     | 17      | 9,9,3      | 11,12   | 11      |
| Sample             | D2S1338 | D19S433 | Vwa    | TPOX   | D18S51  | Amelogenin | D5S818  | FGA     |
| A549 (control)     | 24      | 13      | 14     | 8,11   | 14,17   | X,Y        | 11      | 23      |
| A549               | 24      | 13      | 14     | 8,11   | 14,17   | X          | 11      | 23      |
| NCI-H358 (control) | 17,23   | 13,14   | 17     | 8,9    | 14      | X,Y        | 10,12   | 20,21   |
| H358               | 17,23   | 13,14   | 17     | 8,9    | 14      | X,Y        | 10,12   | 20,21   |
| Calu-1 (control)   | 16,17   | 13,15   | 15,16  | 8      | 14,17   | X          | 10,12   | 20,21   |
| Calu-1             | 16,17   | 13,15   | 15,16  | 8      | 14,17   | X          | 10,12   | 20,21   |

Table S2. Clinical Information for Human Lung Cancer Patients.

| No | Age | Sex | Organ       | Diagnosis                                    | Follow-up |         | Stage |
|----|-----|-----|-------------|----------------------------------------------|-----------|---------|-------|
|    |     |     |             |                                              | months    | results |       |
| 1  | 63  | M   | Lung        | squamous cell carcinoma                      | 132       | alive   | I B   |
| 2  | 63  | M   | Lung        | squamous cell carcinoma                      | 130       | alive   | I B   |
| 3  | 50  | M   | Lung        | squamous cell carcinoma                      | 37        | dead    | II A  |
| 4  | 67  | M   | Lung        | squamous cell carcinoma                      | 40        | dead    | II A  |
| 5  | 54  | M   | Lung        | squamous cell carcinoma                      | 128       | alive   | I B   |
| 6  | 39  | M   | Lung        | squamous cell carcinoma                      | 124       | alive   | IIIA  |
| 7  | 71  | M   | Lung        | squamous cell carcinoma                      | 24        | dead    | II A  |
| 8  | 67  | M   | Lung        | squamous cell carcinoma                      | 24        | dead    | II A  |
| 9  | 65  | M   | Lung        | squamous cell carcinoma                      | 43        | dead    | IIIA  |
| 10 | 47  | M   | Lung        | adenocarcinoma                               | 53        | alive   | II A  |
| 11 | 38  | M   | Lung        | adenocarcinoma                               | 125       | alive   | II A  |
| 12 | 48  | F   | Lung        | adenocarcinoma                               | 53        | dead    | I A   |
| 13 | 67  | M   | Lung        | adenocarcinoma                               | 22        | dead    | I B   |
| 14 | 55  | M   | Lung        | bronchioloalveolar carcinoma                 | 66        | dead    | I A   |
| 15 | 69  | F   | Lung        | bronchioloalveolar carcinoma                 | 125       | alive   | I B   |
| 16 | 52  | F   | Lung        | bronchioloalveolar carcinoma                 | 123       | alive   | I B   |
| 17 | 34  | M   | Lung        | bronchioloalveolar carcinoma                 | 120       | alive   | I B   |
| 18 | 47  | M   | Lung        | adenosquamous carcinoma                      | 131       | alive   | IIIA  |
| 19 | 60  | M   | Lung        | adenosquamous carcinoma                      | 13        | dead    | IIIA  |
| 20 | 60  | F   | Lung        | small cell carcinoma                         | 113       | alive   | II A  |
| 21 | 65  | M   | Lung        | small cell carcinoma                         | 102       | alive   | I B   |
| 22 | 60  | M   | Lung        | combined small cell and adenocarcinoma       | 93        | alive   | II B  |
| 23 | 43  | M   | Lung        | large cell carcinoma                         | 7         | dead    | IIIA  |
| 24 | 56  | M   | Lung        | large cell carcinoma                         | 128       | alive   | II A  |
| 25 | 63  | M   | Lung        | large cell carcinoma                         | 17        | dead    | II A  |
| 26 | 37  | M   | Lung        | mucoepidermoid carcinoma                     | 131       | alive   | I A   |
| 27 | 40  | F   | Lung        | mucoepidermoid carcinoma                     | 2         | dead    | IV    |
| 28 | 26  | F   | Lung        | mucoepidermoid carcinoma                     | 99        | alive   | I B   |
| 29 | 45  | M   | Lung        | squamous cell carcinoma                      | 42        | dead    | IIIB  |
| 30 | 59  | M   | Lung        | squamous cell carcinoma                      | 20        | dead    | IIIB  |
| 31 | 62  | M   | Lung        | squamous cell carcinoma                      | 128       | alive   | IIIA  |
| 32 | 39  | M   | Lung        | squamous cell carcinoma                      | 125       | alive   | II A  |
| 33 | 58  | M   | Lung        | adenocarcinoma                               | 30        | dead    | I B   |
| 34 | 54  | M   | Lung        | adenocarcinoma                               | 18        | dead    | II A  |
| 35 | 62  | F   | Lung        | adenocarcinoma                               | 76        | alive   | IIIB  |
| 36 | 72  | M   | Lung        | mucinous adenocarcinoma                      | 149       | alive   | IIIA  |
| 37 | 67  | F   | Lung        | adenosquamous cell carcinoma                 | 29        | dead    | IIIA  |
| 38 | 56  | M   | Lung        | mucoepidermoid carcinoma                     | 29        | dead    | II A  |
| 39 | 45  | M   | Lymph node  | metastatic carcinoma from #31                | 42        | dead    | IIA   |
| 40 | 59  | M   | Lymph node  | metastatic carcinoma from #32                | 20        | dead    | IIIA  |
| 41 | 62  | M   | Lymph node  | metastatic carcinoma from #33                | 128       | alive   | IB    |
| 42 | 39  | M   | Lymph node  | metastatic carcinoma from #34                | 125       | alive   | IIB   |
| 43 | 66  | M   | Bone        | metastatic carcinoma from #35                | 12        | dead    | IB    |
| 44 | 54  | M   | Lymph node  | metastatic carcinoma from #36                | 18        | dead    | IIIA  |
| 45 | 62  | F   | Lymph node  | metastatic carcinoma from #37                | 76        | alive   | IB    |
| 46 | 72  | M   | Lymph node  | metastatic carcinoma from #38                | 149       | alive   | IB    |
| 47 | 76  | F   | Bone, femur | metastatic carcinoma from #39                | 12        | dead    | IIB   |
| 48 | 63  | M   | Soft tissue | metastatic carcinoma from #40                | 18        | dead    | IB    |
| 49 | 56  | M   | Lung        | squamous cell carcinoma, well differentiated | 46        | dead    | IIIA  |

|     |    |   |      |                                                    |     |       |      |
|-----|----|---|------|----------------------------------------------------|-----|-------|------|
| 50  | 34 | F | Lung | adenocarcinoma, well differentiated                | 24  | dead  | IB   |
| 51  | 69 | F | Lung | adenocarcinoma, well differentiated                | 118 | alive | IIA  |
| 52  | 59 | M | Lung | squamous cell carcinoma, moderately differentiated | 117 | alive | IIA  |
| 53  | 62 | M | Lung | squamous cell carcinoma, moderately differentiated | 22  | dead  | IB   |
| 54  | 42 | M | Lung | bronchioloalveolar carcinoma, non-mucinous         | 16  | dead  | IB   |
| 55  | 64 | M | Lung | adenocarcinoma, well differentiated                | 116 | alive | IIA  |
| 56  | 64 | M | Lung | squamous cell carcinoma, well differentiated       | 15  | dead  | IB   |
| 57  | 68 | M | Lung | squamous cell carcinoma, moderately differentiated | 6   | dead  | IIB  |
| 58  | 73 | M | Lung | large cell neuroendocrine carcinoma                | 10  | dead  | IA   |
| 59  | 66 | M | Lung | squamous cell carcinoma, well differentiated       | 7   | dead  | IIA  |
| 60  | 59 | F | Lung | large cell carcinoma                               | 4   | dead  | IB   |
| 61  | 59 | M | Lung | squamous cell carcinoma, well differentiated       | 10  | dead  | IA   |
| 62  | 65 | M | Lung | bronchioloalveolar carcinoma, non-mucinous         | 110 | alive | IIIA |
| 63  | 64 | M | Lung | bronchioloalveolar carcinoma, mucinous             | 112 | alive | IIB  |
| 64  | 61 | M | Lung | squamous cell carcinoma, moderately differentiated | 109 | alive | IIA  |
| 65  | 69 | F | Lung | squamous cell carcinoma, moderately differentiated | 52  | dead  | IIA  |
| 66  | 64 | M | Lung | squamous cell carcinoma, well differentiated       | 12  | dead  | IIA  |
| 67  | 74 | M | Lung | squamous cell carcinoma, well differentiated       | 18  | dead  | IIA  |
| 68  | 53 | F | Lung | squamous cell carcinoma, spindle cell              | 92  | dead  | IIIA |
| 69  | 61 | M | Lung | squamous cell carcinoma, well differentiated       | 46  | dead  | IIB  |
| 70  | 59 | F | Lung | bronchioloalveolar carcinoma, mucinous             | 41  | dead  | IIA  |
| 71  | 58 | M | Lung | large cell carcinoma                               | 100 | alive | IIIA |
| 72  | 77 | M | Lung | squamous cell carcinoma, moderately differentiated | 20  | dead  | IIIA |
| 73  | 53 | F | Lung | bronchioloalveolar carcinoma, mucinous             | 76  | dead  | IB   |
| 74  | 72 | M | Lung | squamous cell carcinoma, poorly differentiated     | 98  | alive | IIA  |
| 75  | 63 | M | Lung | squamous cell carcinoma, moderately differentiated | 36  | dead  | IB   |
| 76  | 63 | M | Lung | squamous cell carcinoma, moderately differentiated | 97  | dead  | IIB  |
| 77  | 59 | M | Lung | squamous cell carcinoma, moderately differentiated | 97  | alive | IB   |
| 78  | 62 | M | Lung | squamous cell carcinoma, poorly differentiated     | 97  | alive | IB   |
| 79  | 66 | M | Lung | large cell neuroendocrine carcinoma                | 12  | dead  | IIA  |
| 80  | 58 | M | Lung | squamous cell carcinoma, moderately differentiated | 95  | alive | IIIA |
| 81  | 55 | F | Lung | squamous cell carcinoma, poorly differentiated     | 79  | dead  | IIA  |
| 82  | 63 | M | Lung | squamous cell carcinoma, well differentiated       | 3   | dead  | IB   |
| 83  | 81 | M | Lung | squamous cell carcinoma, well differentiated       | 94  | alive | IB   |
| 84  | 54 | M | Lung | squamous cell carcinoma, moderately differentiated | 25  | dead  | IIA  |
| 85  | 49 | M | Lung | squamous cell carcinoma, well differentiated       | 91  | alive | IIA  |
| 86  | 68 | M | Lung | squamous cell carcinoma, poorly differentiated     | 21  | dead  | IIB  |
| 87  | 60 | M | Lung | squamous cell carcinoma, poorly differentiated     | 90  | alive | IIB  |
| 88  | 65 | M | Lung | large cell carcinoma                               | 90  | alive | IB   |
| 89  | 51 | M | Lung | bronchioloalveolar carcinoma, mucinous             | 90  | alive | IIB  |
| 90  | 56 | M | Lung | squamous cell carcinoma, well differentiated       | 25  | dead  | IB   |
| 91  | 46 | M | Lung | squamous cell carcinoma, moderately differentiated | 5   | dead  | IB   |
| 92  | 71 | M | Lung | squamous cell carcinoma, moderately differentiated | 89  | alive | IIIA |
| 93  | 69 | M | Lung | squamous cell carcinoma, poorly differentiated     | 73  | dead  | IB   |
| 94  | 58 | M | Lung | squamous cell carcinoma, well differentiated       | 88  | alive | IIIA |
| 95  | 62 | M | Lung | bronchioloalveolar carcinoma, non-mucinous         | 41  | dead  | IIA  |
| 96  | 71 | M | Lung | squamous cell carcinoma, well differentiated       | 10  | dead  | IIIA |
| 97  | 65 | M | Lung | squamous cell carcinoma, moderately differentiated | 86  | alive | IB   |
| 98  | 67 | M | Lung | squamous cell carcinoma, poorly differentiated     | 108 | dead  | IIB  |
| 99  | 64 | M | Lung | squamous cell carcinoma, poorly differentiated     | 6   | dead  | IB   |
| 100 | 69 | M | Lung | squamous cell carcinoma, moderately differentiated | 84  | alive | IIIA |
| 101 | 33 | F | Lung | adenocarcinoma, moderately differentiated          | 83  | alive | IB   |

|     |    |   |      |                                                |    |       |     |
|-----|----|---|------|------------------------------------------------|----|-------|-----|
| 102 | 60 | F | Lung | adenocarcinoma, well differentiated            | 14 | dead  | IB  |
| 103 | 68 | M | Lung | adenocarcinoma, moderately differentiated      | 80 | alive | IIB |
| 104 | 41 | F | Lung | adenocarcinoma, moderately differentiated      | 20 | dead  | IB  |
| 105 | 67 | M | Lung | normal lung (adjacent to cancer, match of #8)  |    |       |     |
| 106 | 48 | M | Lung | normal lung (adjacent to cancer, match of #12) |    |       |     |
| 107 | 34 | M | Lung | normal lung (adjacent to cancer, match of #17) |    |       |     |
| 108 | 60 | F | Lung | normal lung (adjacent to cancer, match of #20) |    |       |     |
| 109 | 59 | M | Lung | normal lung (adjacent to cancer, match of #32) |    |       |     |
| 110 | 63 | M | Lung | normal lung (apart from cancer, match of #1)   |    |       |     |
| 111 | 55 | M | Lung | normal lung (apart from cancer, match of #14)  |    |       |     |
| 112 | 43 | M | Lung | normal lung (apart from cancer, match of #23)  |    |       |     |
| 113 | 58 | M | Lung | normal lung (apart from cancer, match of #35)  |    |       |     |

**Table S3.** Oligonucleotide sequences for short hairpin RNA, qRT-PCR, ChIP-PCR and gene cloning.

| Oligonucleotides           | Sequences (5'-3')        | IDENTIFIER     |
|----------------------------|--------------------------|----------------|
| <b>Oligomers for shRNA</b> |                          |                |
| shPGC1 $\alpha$ #1         | GCAGAGTATGACGATGGTATT    | TRCN0000001165 |
| shPGC1 $\alpha$ #2         | CCGTATACCTGTGATGCTTT     | TRCN0000001166 |
| shID1 #1                   | CTACGACATGAACGGCTGTTA    | TRCN0000274034 |
| shID1 #2                   | CGGCTGTACTCACGCCTCAA     | TRCN0000019032 |
| <b>Primers for qRT-PCR</b> |                          |                |
| PGC1 $\alpha$ Forward      | CCTGTGATGCTTTTGCTGCTCTTG |                |
| PGC1 $\alpha$ Reverse      | AAACTATCAAAATCCAGAGAGTCA |                |
| CDH1 Forward               | GACCGGTGCAATCTTCAAA      |                |
| CDH1 Reverse               | TTGACGCCGAGAGCTACAC      |                |
| CDH2 Forward               | CCACCTTAAATCTGCAGGC      |                |
| CDH2 Reverse               | GTGCATGAAGGACAGCCTCT     |                |
| VIM Forward                | ATTCCACTTTGCGTTCAAGG     |                |
| VIM Reverse                | CTTCAGAGAGAGGAAGCCGA     |                |
| ITGA5 Forward              | AGGTAGACAGCACCACCTG      |                |
| ITGA5 Reverse              | CTCAGTGGAGTTTACCGGC      |                |
| SNAI1 Forward              | AGGTTGGAGCGGTCAGC        |                |
| SNAI1 Reverse              | CCTTCTCTAGGCCCTGGCT      |                |
| SNAI2 Forward              | TGACCTGTCTGCAAATGCTC     |                |
| SNAI2 Reverse              | CAGACCCTGGTTGCTTCAA      |                |
| ID1 Forward                | CTACGACATGAACGGCTGTACTC  |                |
| ID1 Reverse                | CTTGCTCACCTTGCGTTCT      |                |
| ID2 Forward                | GACAGCAAAGCACTGTGTGG     |                |
| ID2 Reverse                | TCAGCACTTAAAAGATTCCGTG   |                |
| ID3 Forward                | CTCCGGCAGGAGAGGTT        |                |
| ID3 Reverse                | AAAGGAGCTTTTGCCACTGA     |                |
| ID4 Forward                | CCCTCCCTCTCTAGTGCTCC     |                |
| ID4 Reverse                | GTGAACAAGCAGGGCGAC       |                |
| TCF4 Forward               | CATAGGGAGTCCCATCTCCA     |                |
| TCF4 Reverse               | GGACCAACTTCTTTGGCAAG     |                |
| PTHLH Forward              | TTGTCATGGAGGAGCTGATG     |                |
| PTHLH Reverse              | CGGTGTTCTGCTGAGCTAC      |                |
| TGFBI Forward              | GAAGGGAGACAATCGCTTTAGC   |                |
| TGFBI Reverse              | TGTAGACTCCTTCCCGGTTGAG   |                |
| COL5A1 Forward             | TCAGGCAAGTTGTGAAAATCT    |                |
| COL5A1 Reverse             | CCATACCCGCTGGAAAGC       |                |
| NT5E Forward               | TTGGAAATTTGGCCTCTTTG     |                |
| NT5E Reverse               | ACTTCATGAACGCCCTGC       |                |
| MMP2 Forward               | GGAAAGCCAGGATCCATTTT     |                |

|                              |                                 |
|------------------------------|---------------------------------|
| MMP2 Reverse                 | ATGCCGCCTTTAACTGGAG             |
| H36B4 Forward                | TGGTGATACCTAAAGCCTGGAA          |
| H36B4 Reverse                | CATGTTGCTGGCCAATAAGG            |
| <b>Primers for ChIP-PCR</b>  |                                 |
| ID1 (-0.5kb) Forward         | GCTTAGCTTCCTTGCCTCCT            |
| ID1 (-0.5kb) Reverse         | AGCCTCCTGCTCGTCTAGTG            |
| ID1 (-4kb) Forward           | TGAGACAGGGTCTTGCTTTG            |
| ID1 (-4kb) Reverse           | ATGAACCCAAGAAGTGGAGATT          |
| CDH1 (-370~-277) Forward     | CTCCAGCTTGGGTGAAAGAG            |
| CDH1 (-370~-277) Reverse     | GGGCTTTTACACTTGGCTGA            |
| CDH1 (-169~+32) Forward      | TAGAGGGTCACCGCGTCTAT            |
| CDH1 (-169~+32) Reverse      | TCACAGGTGCTTTCAGTTC             |
| CDH2 (+2999~+3112) Forward   | AGGAGTGGGAAGCAGAGCAGT           |
| CDH2 (+2999~+3112) Reverse   | GGCGTGTAAGCAGACCAT              |
| CDH2 (+11208~+11227) Forward | CTCCACTTCCACCTCCACAT            |
| CDH2 (+11208~+11227) Reverse | GAGATCAAGGAGCTGGGGAG            |
| <b>Primers for cloning</b>   |                                 |
| ID1-Luc -289 Forward         | ATAGCTCGAGACCCCTTGCTGTTCTGAAACC |
| ID1-Luc -289 Reverse         | ACCGAAGCTTATGATCTTGGCGACTGGCT   |
| ID2-Luc -352 Forward         | ATAGCTCGAGCCGCACTTACTGTACTGTAC  |
| ID2-Luc -352 Reverse         | ACCGAAGCTTCACACGCTGGAGCTTCCCTT  |

**Table 4.** Antibodies information for western blotting, chromatin immunoprecipitation (ChIP) and immunoprecipitation.

| Antibodies                                  | SOURCE                    | Cat No        |
|---------------------------------------------|---------------------------|---------------|
| anti-Histone H3 (K4-me3) rabbit polyclonal  | Abcam                     | ab8580        |
| anti-RNA polymerase II mouse monoclonal     | Merck Millipore           | 05-623        |
| anti-TCF4 mouse monoclonal                  | Abnova                    | H00006925-M04 |
| anti-Twist1 mouse monoclonal                | Abcam                     | ab50887       |
| anti-PGC1 $\alpha$ mouse monoclonal (4C1.3) | Merck Millipore           | ST1202        |
| anti-E-cadherin mouse monoclonal            | BD Biosciences            | 610181        |
| anti-N-cadherin mouse monoclonal            | BD Biosciences            | 610921        |
| anti-Vimentin (D21H3) rabbit monoclonal     | Cell Signaling Technology | 5741          |
| anti- $\beta$ -actin mouse monoclonal       | Santa Cruz Biotechnology  | sc-47778      |
| anti-ID1 mouse monoclonal                   | Santa Cruz Biotechnology  | sc-133104     |
| anti-ID2 mouse monoclonal                   | Santa Cruz Biotechnology  | sc-398104     |
| anti-Flag mouse monoclonal                  | Sigma-Aldrich             | F3165         |
| anti-Myc-Tag rabbit monoclonal              | Cell Signaling Technology | 2278          |
| anti-mouse IgG Peroxidase-goat              | Jackson Immune Research   | 115-035-003   |
| anti-Rabbit IgG Peroxidase- goat            | Jackson Immune Research   | 111-035-003   |
| Rabbit normal serum                         | Santa Cruz Biotechnology  | sc-2027       |
| Mouse normal serum                          | Santa Cruz Biotechnology  | sc-2025       |
